# Supplementary material
Source: publisher figshare collection journal article supplement (https://karger.figshare.com/ndownloader/files/28613796)
Supplement: Supplementary file 1 [file 28613796]

# Appendix

## Table of Contents

|                                                                                    |    |
|------------------------------------------------------------------------------------|----|
| GATHER checklist, with description of compliance and location of information ..... | 2  |
| Systematic review methods.....                                                     | 4  |
| Traumatic brain injury (TBI) .....                                                 | 4  |
| Parkinson's disease .....                                                          | 5  |
| Down syndrome .....                                                                | 5  |
| Stroke .....                                                                       | 6  |
| Systematic Review References .....                                                 | 8  |
| Traumatic Brain Injury (TBI) .....                                                 | 8  |
| Parkinson's disease .....                                                          | 10 |
| Down Syndrome.....                                                                 | 13 |
| Stroke .....                                                                       | 15 |
| Study characteristics table.....                                                   | 18 |
| Bayesian meta-regression model settings .....                                      | 20 |
| Bayesian meta-regression methods .....                                             | 21 |
| Mixed-effects model .....                                                          | 21 |
| Constraints and priors.....                                                        | 21 |
| Trimming outliers.....                                                             | 21 |
| Final estimator .....                                                              | 23 |
| Non-linear dose-response curves with constrained splines .....                     | 23 |
| B-splines and bases .....                                                          | 23 |
| Shape constraints.....                                                             | 24 |
| Posterior variance estimation .....                                                | 25 |
| References .....                                                                   | 26 |
| Global Burden of Disease world regions.....                                        | 27 |
| Dementia prevalence estimation.....                                                | 28 |
| Flowchart .....                                                                    | 28 |
| Case definition .....                                                              | 28 |
| Input data.....                                                                    | 29 |
| Modelling strategy .....                                                           | 29 |

33 **GATHER checklist, with description of compliance and location of information**

| #                                                                                                     | GATHER checklist item                                                                                                                                                                                                                                                                                                                                                                   | Description of compliance                                                                                                                                  | Reference                                                                                                                                                  |
|-------------------------------------------------------------------------------------------------------|-----------------------------------------------------------------------------------------------------------------------------------------------------------------------------------------------------------------------------------------------------------------------------------------------------------------------------------------------------------------------------------------|------------------------------------------------------------------------------------------------------------------------------------------------------------|------------------------------------------------------------------------------------------------------------------------------------------------------------|
| <b>Objectives and funding</b>                                                                         |                                                                                                                                                                                                                                                                                                                                                                                         |                                                                                                                                                            |                                                                                                                                                            |
| 1                                                                                                     | Define the indicators, populations, and time periods for which estimates were made.                                                                                                                                                                                                                                                                                                     | Narrative provided in paper and appendix describing indicators, definitions, and populations                                                               | Main text (Methods) and appendix                                                                                                                           |
| 2                                                                                                     | List the funding sources for the work.                                                                                                                                                                                                                                                                                                                                                  | Funding sources listed in paper                                                                                                                            | Summary (Funding)                                                                                                                                          |
| <b>Data Inputs</b>                                                                                    |                                                                                                                                                                                                                                                                                                                                                                                         |                                                                                                                                                            |                                                                                                                                                            |
| <i>For all data inputs from multiple sources that are synthesized as part of the study:</i>           |                                                                                                                                                                                                                                                                                                                                                                                         |                                                                                                                                                            |                                                                                                                                                            |
| 3                                                                                                     | Describe how the data were identified and how the data were accessed.                                                                                                                                                                                                                                                                                                                   | Narrative description of data seeking methods provided                                                                                                     | Main text (Methods) and appendix                                                                                                                           |
| 4                                                                                                     | Specify the inclusion and exclusion criteria. Identify all ad-hoc exclusions.                                                                                                                                                                                                                                                                                                           | Narrative about inclusion and exclusion criteria by data type provided; ad hoc exclusions in cause-specific write-ups                                      | Main text (Methods) and appendix                                                                                                                           |
| 5                                                                                                     | Provide information on all included data sources and their main characteristics. For each data source used, report reference information or contact name/institution, population represented, data collection method, year(s) of data collection, sex and age range, diagnostic criteria or measurement method, and sample size, as relevant.                                           | An interactive, online data source tool that provides metadata for data sources by component, geography, cause, risk, or impairment has been developed     | Online data citation tools:<br><a href="http://ghdx.healthdata.org/gbd-2019/data-input-sources">http://ghdx.healthdata.org/gbd-2019/data-input-sources</a> |
| 6                                                                                                     | Identify and describe any categories of input data that have potentially important biases (e.g., based on characteristics listed in item 5).                                                                                                                                                                                                                                            | Summary of known biases by cause included in appendix                                                                                                      | Appendix                                                                                                                                                   |
| <i>For data inputs that contribute to the analysis but were not synthesized as part of the study:</i> |                                                                                                                                                                                                                                                                                                                                                                                         |                                                                                                                                                            |                                                                                                                                                            |
| 7                                                                                                     | Describe and give sources for any other data inputs.                                                                                                                                                                                                                                                                                                                                    | Included in online data source tool                                                                                                                        | <a href="http://ghdx.healthdata.org/gbd-2019/data-input-sources">http://ghdx.healthdata.org/gbd-2019/data-input-sources</a>                                |
| <b>For all data inputs:</b>                                                                           |                                                                                                                                                                                                                                                                                                                                                                                         |                                                                                                                                                            |                                                                                                                                                            |
| 8                                                                                                     | Provide all data inputs in a file format from which data can be efficiently extracted (e.g., a spreadsheet as opposed to a PDF), including all relevant meta-data listed in item 5. For any data inputs that cannot be shared due to ethical or legal reasons, such as third-party ownership, provide a contact name or the name of the institution that retains the right to the data. | Downloads of input data available through online data tools (visualization/ data query, GHDx); input data not in tools will be made available upon request | Online data visualization tools, data query tools, and the Global Health Data Exchange                                                                     |
| <b>Data analysis</b>                                                                                  |                                                                                                                                                                                                                                                                                                                                                                                         |                                                                                                                                                            |                                                                                                                                                            |
| 9                                                                                                     | Provide a conceptual overview of the data analysis method. A diagram may be helpful.                                                                                                                                                                                                                                                                                                    | Flow diagrams of methods have been provided                                                                                                                | Appendix                                                                                                                                                   |
| 10                                                                                                    | Provide a detailed description of all steps of the analysis, including mathematical formulae. This description should cover, as relevant, data cleaning, data pre-processing, data adjustments and weighting of data sources, and mathematical or statistical model(s).                                                                                                                 | Flow diagrams and methods write-ups have been provided                                                                                                     | Main text (Methods) and appendix                                                                                                                           |
| 11                                                                                                    | Describe how candidate models were evaluated and how the final model(s) were selected.                                                                                                                                                                                                                                                                                                  | Provided in methodological write-up                                                                                                                        | Appendix                                                                                                                                                   |
| 12                                                                                                    | Provide the results of an evaluation of model performance, if done, as well as the results of any relevant sensitivity analysis.                                                                                                                                                                                                                                                        | Provided in methodological write-up                                                                                                                        | Appendix                                                                                                                                                   |
| 13                                                                                                    | Describe methods for calculating uncertainty of the estimates. State which sources of uncertainty were, and were not, accounted for in the uncertainty analysis.                                                                                                                                                                                                                        | Narrative description of uncertainty interval calculation                                                                                                  | Main text (Methods) and appendix                                                                                                                           |

|                               |                                                                                                 |                                                                                                                   |                                                                                                 |
|-------------------------------|-------------------------------------------------------------------------------------------------|-------------------------------------------------------------------------------------------------------------------|-------------------------------------------------------------------------------------------------|
| 1<br>4                        | State how analytic or statistical source code used to generate estimates can be accessed.       | Appendix                                                                                                          | <a href="http://ghdx.healthdata.org/gbd-2019/code">http://ghdx.healthdata.org/gbd-2019/code</a> |
| <b>Results and Discussion</b> |                                                                                                 |                                                                                                                   |                                                                                                 |
| 1<br>5                        | Provide published estimates in a file format from which data can be efficiently extracted.      | GBD 2019 results available through online data tools, the Global Health Data Exchange, and online data query tool | Main text, appendix, online data tools (visualization/ data query tools, GHDx)                  |
| 1<br>6                        | Report a quantitative measure of the uncertainty of the estimates (e.g. uncertainty intervals). | Uncertainty provided with all results                                                                             | Main text, appendix, online data tools (visualization/ data query tools, GHDx)                  |

34  
35  
36  
37  
38  
39  
40  
41  
42  
43  
44  
45  
46  
47  
48  
49  
50  
51  
52  
53  
54  
55  
56

## Systematic review methods

Across all five reviews, studies were required to be either population-representative or conducted in outpatient settings, were required to report the mean age of the sample, and had to report either the proportion of exposed individuals with dementia or the relative risk of dementia comparing exposed to unexposed individuals. Across all studies dementia or cognitive impairment were assessed either via clinical judgement, performance on neurocognitive tests and survey responses, or through medical records. Statistical adjustments were performed in the modeling stage to account for these differences. Each clinical condition was assessed either via clinical judgement, self-report on surveys or medical records.

### Traumatic brain injury (TBI)

**Case definition:** TBI is a trauma to the head associated with disruption of normal function of the brain. We required that TBI be of moderate or severe severity, as defined by either a loss of consciousness or interaction with the health care system.

A search revealed three different recent systematic reviews on the relationship between TBI and dementia. These reviews were:

Dams-O'Connor K, Guetta G, Hahn-Ketter AE, Fedor A. Traumatic brain injury as a risk factor for Alzheimer's disease: current knowledge and future directions. *Neurodegener Dis Manag* 2016; **6**: 417–29.

Hicks AJ, James AC, Spitz G, Ponsford JL. Traumatic Brain Injury as a Risk Factor for Dementia and Alzheimer Disease: Critical Review of Study Methodologies. *Journal of Neurotrauma* 2019; published online May 21. DOI:[10.1089/neu.2018.6346](https://doi.org/10.1089/neu.2018.6346).

Perry DC, Sturm VE, Peterson MJ, *et al.* Association of traumatic brain injury with subsequent neurological and psychiatric disease: a meta-analysis. *J Neurosurg* 2016; **124**: 511–26.

Overall, there were 73 unique sources listed across the three reviews, and 46 of these met inclusion criteria for extraction.

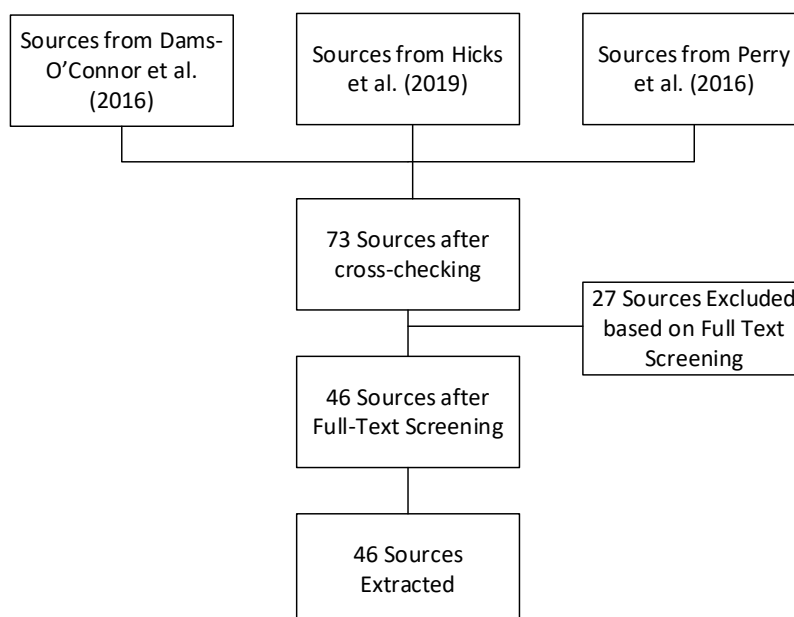

## Parkinson's disease

**Case definition:** Parkinson's disease is a chronic, degenerative, and progressive neurological condition typified by the loss of motor mobility and control – most notably tremors. The corresponding ICD-10 codes are G20, G21, and G22. Our case definition for GBD is the presence of at least two of the four primary symptoms: (1) tremors/trembling, (2) bradykinesia, (3) stiffness of limbs and torso, and (4) posture instability.

For the review on Parkinson's disease, we conducted a PubMed search on 2/14/2019 using the search string:

```
(((((Dementia[Title/Abstract] OR Alzheimer's Disease[Title/Abstract] OR Cognitive Impairment[Title/Abstract] OR Dementia[MeSH Major Topic]) AND (Parkinson*[Title/Abstract] OR Parkinson Disease[MeSH Major Topic]) AND (prevalence[Title/Abstract] OR epidemiology[Title/Abstract] OR incidence[Title/Abstract]) NOT (animals[MeSH] NOT humans[MeSH])))))).
```

This search resulted in 1475 hits, and of these 115 passed title/abstract screening. Ultimately, 50 sources were accepted and extracted.

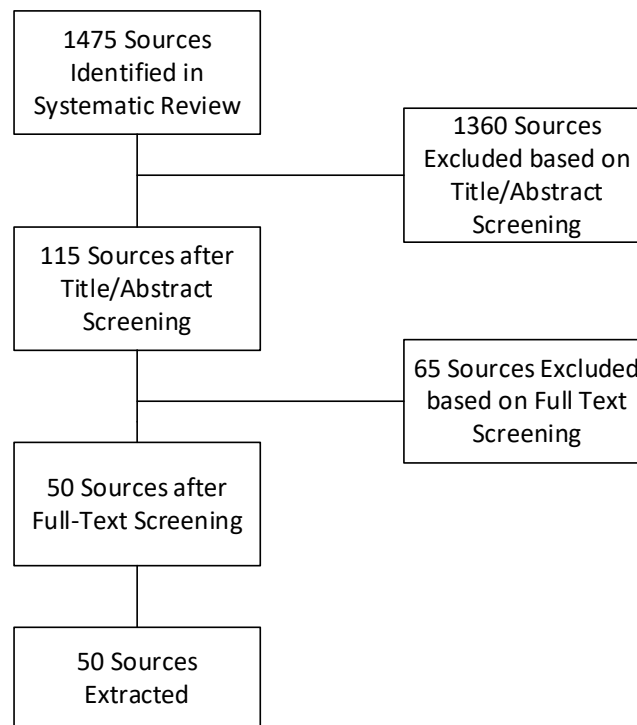

## Down syndrome

**Case definition:** Down syndrome, also known as Trisomy 21, is the presence of a third copy of chromosome 21, typically caused by nondisjunction during the production of gametes. Down syndrome is associated with several specific physical characteristics, including decreased muscle tone, flat facial features, an upward slant to the eyes, abnormally shaped ears, a single deep crease across the center of the palm, folded skin on the inner corners of the eyes, and ability to extend joints beyond the usual, among others. The GBD case definition of Down syndrome includes ICD-10 codes Q90.0, Q90.1, Q90.2, and Q90.9.

We searched PubMed on 5/31/2019 using the search string:

(((((dement\*[Title/Abstract] OR alzheimer\*[Title/Abstract] OR cognitive impairment[Title/Abstract] OR dementia[MeSH]) AND (down syndrome[Title/Abstract] OR down's syndrome[Title/Abstract] OR down syndrome[MeSH]) AND (prevalence[Title/Abstract] OR epidemiology[Title/Abstract] OR predict\*[Title/Abstract] OR risk factor\*[Title/Abstract] OR hazard[Title/Abstract] OR determinant\*[Title/Abstract])) NOT (animals[MeSH] NOT humans[MeSH])))).

Of 355 total hits, 102 passed title/abstract screening. Out of these sources, 25 passed full text screening and were extracted.

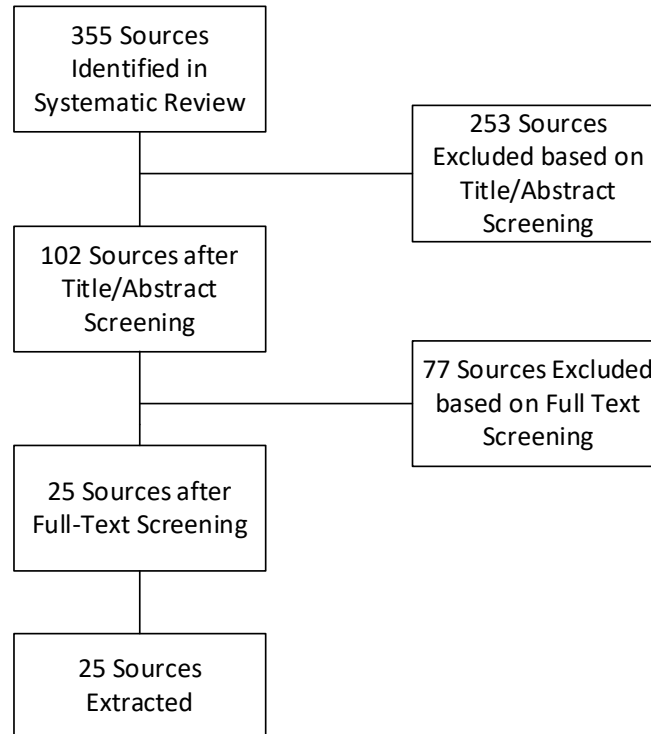

## Stroke

**Case definition:** Stroke was defined according to WHO criteria – rapidly developing clinical signs of focal (at times global) disturbance of cerebral function lasting more than 24 hours or leading to death with no apparent cause other than that of vascular origin. Data on transient ischaemic attack (TIA) were not included.

A recent systematic review was identified describing the relationship between clinical stroke and dementia:

Kuźma E, Lourida I, Moore SF, Levine DA, Ukoumunne OC, Llewellyn DJ. Stroke and dementia risk: A systematic review and meta-analysis. *Alzheimers Dement* 2018; **14**: 1416–26.

Of the 48 studies included in this review, 32 met our inclusion criteria. The initial component studies were identified and data were extracted. We also updated this review through a PubMed search conducted on 04/3/2019, using the search string:

(((dement\*[Title/Abstract]) OR (alzheimer\*[Title/Abstract])) AND ((stroke[Title/Abstract]) OR (ischemic stroke[Title/Abstract]) OR (ischaemic stroke[Title/Abstract]) OR (intracerebral hemorrhage[Title/Abstract]) OR (intracerebral haemorrhage[Title/Abstract]) OR (hemorrhagic stroke[Title/Abstract]) OR (cerebrovascular accident\*[Title/Abstract]) OR (cerebral vascular accident\*[Title/Abstract]) OR (brain infarct\*[Title/Abstract]) OR (cerebral infarct\*[Title/Abstract]) OR (poststroke[Title/Abstract]) or (post stroke[Title/Abstract]) OR (haemorrhagic stroke[Title/Abstract]) OR (subarachnoid hemorrhage[Title/Abstract]) OR (subarachnoid haemorrhage[Title/Abstract]) OR (subarachnoid hemorrhage[Title/Abstract]) OR (subarachnoid haemorrhage[Title/Abstract])) AND ((prevalence[Title/Abstract]) OR (epidemiology[Title/Abstract]) OR (predict\*[Title/Abstract]) OR (risk factor\*[Title/Abstract]) OR (hazard[Title/Abstract]) OR (determinant\*[Title/Abstract]) NOT (animals[MeSH] NOT humans[MeSH]))) AND ("2017/04/27"[Date - Publication] : "3000"[Date - Publication])).

This search targeted studies published after 4/27/2017, the publication date of the most recent study included in the Kuzma review. This search identified 504 studies. 78 studies passed title/abstract screening and ultimately two additional studies were accepted and extracted.

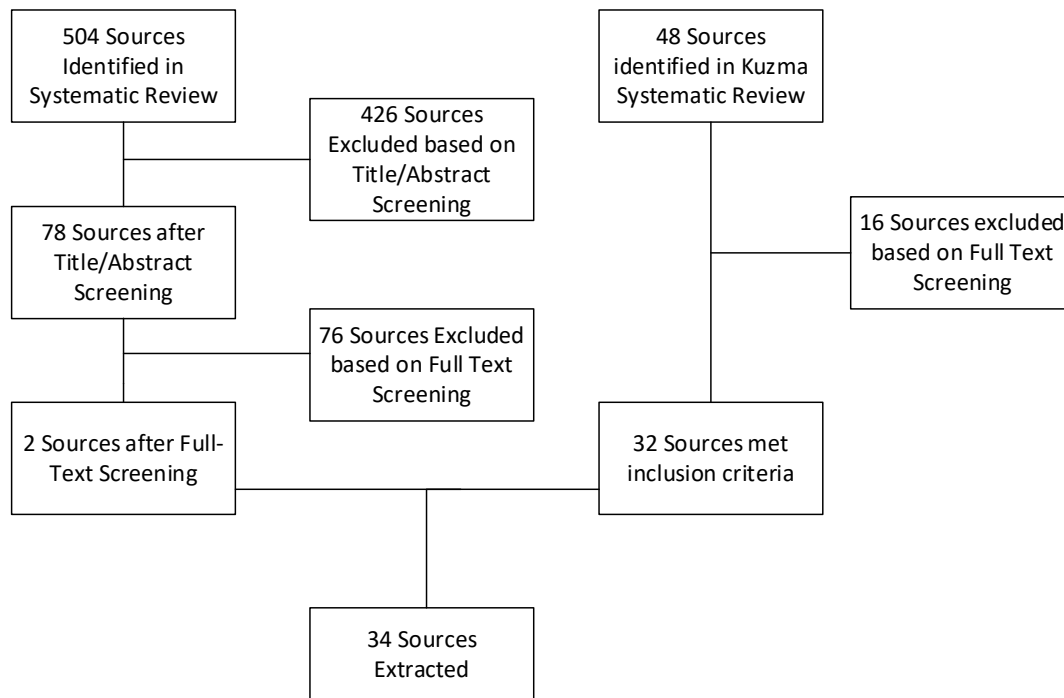

## Systematic Review References

### Traumatic Brain Injury (TBI)

1. Broe GA, Henderson AS, Creasey H, McCusker E, Korten AE, Jorm AF, et al. A case-control study of Alzheimer's disease in Australia. *Neurology*. 1990 Nov;40(11):1698–707.
2. Li G, Shen YC, Li YT, Chen CH, Zhau YW, Silverman JM. A case-control study of Alzheimer's disease in China. *Neurology*. 1992 Aug;42(8):1481–8.
3. Kondo K, Niino M, Shido K. A case-control study of Alzheimer's disease in Japan--significance of life-styles. *Dementia*. 1994 Dec;5(6):314–26.
4. French LR, Schuman LM, Mortimer JA, Hutton JT, Boatman RA, Christians B. A case-control study of dementia of the Alzheimer type. *Am J Epidemiol*. 1985 Mar;121(3):414–21.
5. Harwood DG, Barker WW, Loewenstein DA, Ownby RL, St George-Hyslop P, Mullan M, et al. A cross-ethnic analysis of risk factors for AD in white Hispanics and white non-Hispanics. *Neurology*. 1999 Feb;52(3):551–6.
6. Ryan DH. A Scottish record linkage study of risk factors in medical history and dementia outcome in hospital patients. *Dementia*. 1994 Dec;5(6):339–47.
7. Schofield PW, Tang M, Marder K, Bell K, Dooneief G, Chun M, et al. Alzheimer's disease after remote head injury: an incidence study. *J Neurol Neurosurg Psychiatry*. 1997 Feb;62(2):119–24.
8. Barnes DE, Byers AL, Gardner RC, Seal KH, Boscardin WJ, Yaffe K. Association of Mild Traumatic Brain Injury With and Without Loss of Consciousness With Dementia in US Military Veterans. *JAMA Neurol*. 2018 01;75(9):1055–61.
9. Crane PK, Gibbons LE, Dams-O'Connor K, Trittschuh E, Leverenz JB, Keene CD, et al. Association of Traumatic Brain Injury With Late-Life Neurodegenerative Conditions and Neuropathologic Findings. *JAMA Neurol*. 2016 01;73(9):1062–9.
10. Chandra V, Philipose V, Bell PA, Lazaroff A, Schoenberg BS. Case-control study of late onset "probable Alzheimer's disease." *Neurology*. 1987 Aug;37(8):1295–300.
11. Bachman DL, Green RC, Benke KS, Cupples LA, Farrer LA, MIRAGE Study Group. Comparison of Alzheimer's disease risk factors in white and African American families. *Neurology*. 2003 Apr;60(8):1372–4.
12. Gardner RC, Burke JF, Nettiksimmons J, Kaup A, Barnes DE, Yaffe K. Dementia risk after traumatic brain injury vs nonbrain trauma: the role of age and severity. *JAMA Neurol*. 2014 Dec;71(12):1490–7.
13. Plassman BL, Havlik RJ, Steffens DC, Helms MJ, Newman TN, Drosdick D, et al. Documented head injury in early adulthood and risk of Alzheimer's disease and other dementias. *Neurology*. 2000 Oct;55(8):1158–66.
14. Smith K, Flicker L, Dwyer A, Atkinson D, Almeida OP, Lautenschlager NT, et al. Factors associated with dementia in Aboriginal Australians. *Aust N Z J Psychiatry*. 2010 Oct;44(10):888–93.
15. Luukinen H, Viramo P, Herala M, Kervinen K, Kesäniemi YA, Savola O, et al. Fall-related brain injuries and the risk of dementia in elderly people: a population-based study. *Eur J Neurol*. 2005 Feb;12(2):86–92.
16. Mayeux R, Ottman R, Tang MX, Noboa-Bauza L, Marder K, Gurland B, et al. Genetic susceptibility and head injury as risk factors for Alzheimer's disease among community-dwelling elderly persons and their first-degree relatives. *Ann Neurol*. 1993 May;33(5):494–501.



17. Chu S-F, Chiu W-T, Lin H-W, Chiang Y-H, Liou T-H. Hazard Ratio and Repeat Injury for Dementia in Patients With and Without a History of Traumatic Brain Injury: A Population-Based Secondary Data Analysis in Taiwan. *Asia Pac J Public Health*. 2016;28(6):519–27.
18. O’Meara ES, Kukull WA, Sheppard L, Bowen JD, McCormick WC, Teri L, et al. Head injury and risk of Alzheimer’s disease by apolipoprotein E genotype. *Am J Epidemiol*. 1997 Sep;146(5):373–84.
19. Guo Z, Cupples LA, Kurz A, Auerbach SH, Volicer L, Chui H, et al. Head injury and the risk of AD in the MIRAGE study. *Neurology*. 2000 Mar;54(6):1316–23.
20. Salib E, Hillier V. Head injury and the risk of Alzheimer’s disease: a case control study. *Int J Geriatr Psychiatry*. 1997 Mar;12(3):363–8.
21. Rasmusson DX, Brandt J, Martin DB, Folstein MF. Head injury as a risk factor in Alzheimer’s disease. *Brain Inj*. 1995 Apr;9(3):213–9.
22. Mehta KM, Ott A, Kalmijn S, Slooter AJ, van Duijn CM, Hofman A, et al. Head trauma and risk of dementia and Alzheimer’s disease: The Rotterdam Study. *Neurology*. 1999 Dec;53(9):1959–62.
23. van Duijn CM, Tanja TA, Haaxma R, Schulte W, Saan RJ, Lameris AJ, et al. Head trauma and the risk of Alzheimer’s disease. *Am J Epidemiol*. 1992 Apr;135(7):775–82.
24. Sundström A, Nilsson L-G, Cruts M, Adolfsson R, Van Broeckhoven C, Nyberg L. Increased risk of dementia following mild head injury for carriers but not for non-carriers of the APOE epsilon4 allele. *Int Psychogeriatr*. 2007 Feb;19(1):159–65.
25. Lee Y-K, Hou S-W, Lee C-C, Hsu C-Y, Huang Y-S, Su Y-C. Increased risk of dementia in patients with mild traumatic brain injury: a nationwide cohort study. *PLoS ONE*. 2013;8(5):e62422.
26. Helmes E, Østbye T, Steenhuis RE. Incremental contribution of reported previous head injury to the prediction of diagnosis and cognitive functioning in older adults. *Brain Inj*. 2011;25(4):338–47.
27. Tyas SL, Pederson LL, Koval JJ. Is smoking associated with the risk of developing Alzheimer’s disease? Results from three Canadian data sets. *Ann Epidemiol*. 2000 Oct;10(7):409–16.
28. Fann JR, Ribe AR, Pedersen HS, Fenger-Grøn M, Christensen J, Benros ME, et al. Long-term risk of dementia among people with traumatic brain injury in Denmark: a population-based observational cohort study. *Lancet Psychiatry*. 2018;5(5):424–31.
29. Wang H-K, Lin S-H, Sung P-S, Wu M-H, Hung K-W, Wang L-C, et al. Population based study on patients with traumatic brain injury suggests increased risk of dementia. *J Neurol Neurosurg Psychiatry*. 2012 Nov;83(11):1080–5.
30. Mendez MF, Paholpak P, Lin A, Zhang JY, Teng E. Prevalence of Traumatic Brain Injury in Early Versus Late-Onset Alzheimer’s Disease. *J Alzheimers Dis*. 2015;47(4):985–93.
31. Launer LJ, Andersen K, Dewey ME, Letenneur L, Ott A, Amaducci LA, et al. Rates and risk factors for dementia and Alzheimer’s disease: results from EURODEM pooled analyses. EURODEM Incidence Research Group and Work Groups. *European Studies of Dementia*. *Neurology*. 1999 Jan;52(1):78–84.
32. Hall K, Gureje O, Gao S, Ogunniyi A, Hui SL, Baiyewu O, et al. Risk factors and Alzheimer’s disease: a comparative study of two communities. *Aust N Z J Psychiatry*. 1998 Oct;32(5):698–706.
33. Suhanov AV, Pilipenko PI, Korczyn AD, Hofman A, Voevoda MI, Shishkin SV, et al. Risk factors for Alzheimer’s disease in Russia: a case-control study. *Eur J Neurol*. 2006 Sep;13(9):990–5.

34. Lindsay J, Laurin D, Verreault R, Hébert R, Helliwell B, Hill GB, et al. Risk factors for Alzheimer's disease: a prospective analysis from the Canadian Study of Health and Aging. *Am J Epidemiol*. 2002 Sep;156(5):445–53.
35. Ogunniyi A, Hall KS, Gureje O, Baiyewu O, Gao S, Unverzagt FW, et al. Risk factors for incident Alzheimer's disease in African Americans and Yoruba. *Metab Brain Dis*. 2006 Sep;21(2–3):235–40.
36. Fratiglioni L, Ahlbom A, Viitanen M, Winblad B. Risk factors for late-onset Alzheimer's disease: a population-based, case-control study. *Ann Neurol*. 1993 Mar;33(3):258–66.
37. Mendez MF, Underwood KL, Zander BA, Mastri AR, Sung JH, Frey WH. Risk factors in Alzheimer's disease: a clinicopathologic study. *Neurology*. 1992 Apr;42(4):770–5.
38. Forster DP, Newens AJ, Kay DW, Edwardson JA. Risk factors in clinically diagnosed presenile dementia of the Alzheimer type: a case-control study in northern England. *J Epidemiol Community Health*. 1995 Jun;49(3):253–8.
39. McDermott S, Moran R, Platt T, Isaac T, Wood H, Dasari S. Risk for onset of health conditions among community-living adults with spinal cord and traumatic brain injuries. *Primary Health Care Research & Development*. 2007 Jan;8(1):36–43.
40. Graves AB, White E, Koepsell TD, Reifler BV, van Belle G, Larson EB, et al. The association between head trauma and Alzheimer's disease. *Am J Epidemiol*. 1990 Mar;131(3):491–501.
41. The Canadian Study of Health and Aging: risk factors for Alzheimer's disease in Canada. *Neurology*. 1994 Nov;44(11):2073–80.
42. Paschalis C, Polychronopoulos P, Lekka NP, Harrison MJG, Papapetropoulos T. The Role of Head Injury, Surgical Anaesthesia and Family History as Aetiological Factors in Dementia of Alzheimer Type. *DEM*. 1990;1(1):52–5.
43. Barnes DE, Kaup A, Kirby KA, Byers AL, Diaz-Arrastia R, Yaffe K. Traumatic brain injury and risk of dementia in older veterans. *Neurology*. 2014 Jul;83(4):312–9.
44. Nordström A, Nordström P. Traumatic brain injury and the risk of dementia diagnosis: A nationwide cohort study. *PLoS Med*. 2018;15(1):e1002496.
45. Nemetz PN, Leibson C, Naessens JM, Beard M, Kokmen E, Annegers JF, et al. Traumatic brain injury and time to onset of Alzheimer's disease: a population-based study. *Am J Epidemiol*. 1999 Jan;149(1):32–40.
46. Brayne C, Gill C, Huppert FA, Barkley C, Gehlhaar E, Girling DM, et al. Vascular risks and incident dementia: results from a cohort study of the very old. *Dement Geriatr Cogn Disord*. 1998 Jun;9(3):175–80.

## Parkinson's disease

1. Almeida OP, McCaul K, Hankey GJ, Yeap BB, Golledge J, Flicker L. Affective Disorders, Psychosis and Dementia in a Community Sample of Older Men with and without Parkinson's Disease. *PLoS ONE*. 2016;11(9):e0163781.
2. Altmann V, Schumacher-Schuh AF, Rieck M, Callegari-Jacques SM, Rieder CRM, Hutz MH. Val66Met BDNF polymorphism is associated with Parkinson's disease cognitive impairment. *Neurosci Lett*. 2016 Feb;615:88–91.
3. Barone P, Antonini A, Colosimo C, Marconi R, Morgante L, Avarello TP, et al. The PRIAMO study: A multicenter assessment of nonmotor symptoms and their impact on quality of life in Parkinson's disease. *Mov Disord*. 2009 Aug;24(11):1641–9.

4. Biundo R, Weis L, Pilleri M, Facchini S, Formento-Dojot P, Valletunga A, et al. Diagnostic and screening power of neuropsychological testing in detecting mild cognitive impairment in Parkinson's disease. *J Neural Transm (Vienna)*. 2013 Apr;120(4):627–33.
5. Camargo CHF, Jobbins VA, Serpa RA, Berbetz FA, Sabatini JS, Teive HAG. Association between olfactory loss and cognitive deficits in Parkinson's disease. *Clin Neurol Neurosurg*. 2018;173:120–3.
6. Cereda E, Cilia R, Klersy C, Canesi M, Zecchinelli AL, Mariani CB, et al. Swallowing disturbances in Parkinson's disease: a multivariate analysis of contributing factors. *Parkinsonism Relat Disord*. 2014 Dec;20(12):1382–7.
7. Cereda E, Cilia R, Klersy C, Siri C, Pozzi B, Reali E, et al. Dementia in Parkinson's disease: Is male gender a risk factor? *Parkinsonism Relat Disord*. 2016;26:67–72.
8. Dujardin K, Sockeel P, Devos D, Delliaux M, Krystkowiak P, Destée A, et al. Characteristics of apathy in Parkinson's disease. *Mov Disord*. 2007 Apr;22(6):778–84.
9. Estanga A, Rodriguez-Oroz MC, Ruiz-Martinez J, Barandiaran M, Gorostidi A, Bergareche A, et al. Cognitive dysfunction in Parkinson's disease related to the R1441G mutation in LRRK2. *Parkinsonism Relat Disord*. 2014 Oct;20(10):1097–100.
10. Fénelon G, Mahieux F, Huon R, Ziegler M. Hallucinations in Parkinson's disease: prevalence, phenomenology and risk factors. *Brain*. 2000 Apr;123 ( Pt 4):733–45.
11. Forsaa EB, Larsen JP, Wentzel-Larsen T, Goetz CG, Stebbins GT, Aarsland D, et al. A 12-year population-based study of psychosis in Parkinson disease. *Arch Neurol*. 2010 Aug;67(8):996–1001.
12. Gao J, Huang X, Park Y, Liu R, Hollenbeck A, Schatzkin A, et al. Apolipoprotein E genotypes and the risk of Parkinson disease. *Neurobiol Aging*. 2011 Nov;32(11):2106.e1–6.
13. Hobson P, Meara J. Risk and incidence of dementia in a cohort of older subjects with Parkinson's disease in the United Kingdom. *Mov Disord*. 2004 Sep;19(9):1043–9.
14. Hobson P, Meara J. Mild cognitive impairment in Parkinson's disease and its progression onto dementia: a 16-year outcome evaluation of the Denbighshire cohort. *Int J Geriatr Psychiatry*. 2015 Oct;30(10):1048–55.
15. Hoops S, Nazem S, Siderowf AD, Duda JE, Xie SX, Stern MB, et al. Validity of the MoCA and MMSE in the detection of MCI and dementia in Parkinson disease. *Neurology*. 2009 Nov;73(21):1738–45.
16. Huang Y-C, Wu S-T, Lin J-J, Lin C-C, Kao C-H. Prevalence and risk factors of cognitive impairment in Parkinson disease: a population-based case-control study in Taiwan. *Medicine (Baltimore)*. 2015 May;94(17):e782.
17. Huber SJ, Shuttleworth EC, Christy JA, Rice RR. A brief scale for the dementia of Parkinson's disease. *J Neuropsychiatry Clin Neurosci*. 1990;2(2):183–8.
18. Hughes TA, Ross HF, Musa S, Bhattacharjee S, Nathan RN, Mindham RH, et al. A 10-year study of the incidence of and factors predicting dementia in Parkinson's disease. *Neurology*. 2000 Apr;54(8):1596–602.
19. Idiaquez J, Benarroch EE, Rosales H, Milla P, Ríos L. Autonomic and cognitive dysfunction in Parkinson's disease. *Clin Auton Res*. 2007 Apr;17(2):93–8.
20. Kadastik-Eerme L, Rosenthal M, Paju T, Muldmaa M, Taba P. Health-related quality of life in Parkinson's disease: a cross-sectional study focusing on non-motor symptoms. *Health Qual Life Outcomes*. 2015 Jun;13:83.

21. Kandiah N, Narasimhalu K, Lau P-N, Seah S-H, Au WL, Tan LCS. Cognitive decline in early Parkinson's disease. *Mov Disord.* 2009 Mar;24(4):605–8.
22. Khedr EM, Fawi G, Abbas MAA, Mohammed TA, El-Fetoh NA, Attar GA, et al. Prevalence of Parkinsonism and Parkinson's disease in Qena governorate/Egypt: a cross-sectional community-based survey. *Neurol Res.* 2015 Jul;37(7):607–18.
23. Lawrence BJ, Gasson N, Loftus AM. Prevalence and Subtypes of Mild Cognitive Impairment in Parkinson's Disease. *Sci Rep.* 2016 21;6:33929.
24. Lieberman A, Dzialowski M, Kupersmith M, Serby M, Goodgold A, Korein J, et al. Dementia in Parkinson Disease. *Ann Neurol.* 1979 Oct;6(4):355–9.
25. Loftus AM, Bucks RS, Thomas M, Kane R, Timms C, Barker RA, et al. Retrospective assessment of movement disorder society criteria for mild cognitive impairment in Parkinson's disease. *J Int Neuropsychol Soc.* 2015 Feb;21(2):137–45.
26. Marttila RJ, Rinne UK. Dementia in Parkinson's disease. *Acta Neurol Scand.* 1976 Nov;54(5):431–41.
27. Mata IF, Leverenz JB, Weintraub D, Trojanowski JQ, Chen-Plotkin A, Van Deerlin VM, et al. GBA Variants are associated with a distinct pattern of cognitive deficits in Parkinson's disease. *Mov Disord.* 2016 Jan;31(1):95–102.
28. Mayeux R, Denaro J, Hemenegildo N, Marder K, Tang MX, Cote LJ, et al. A population-based investigation of Parkinson's disease with and without dementia. Relationship to age and gender. *Arch Neurol.* 1992 May;49(5):492–7.
29. McDermott KL, Fisher N, Bradford S, Camicioli R. Parkinson's disease mild cognitive impairment classifications and neurobehavioral symptoms. *Int Psychogeriatr.* 2018;30(2):253–60.
30. Melcon MO, Anderson DW, Vergara RH, Rocca WA. Prevalence of Parkinson's disease in Junín, Buenos Aires Province, Argentina. *Mov Disord.* 1997 Mar;12(2):197–205.
31. Monastero R, Cicero CE, Baschi R, Davì M, Luca A, Restivo V, et al. Mild cognitive impairment in Parkinson's disease: the Parkinson's disease cognitive study (PACOS). *J Neurol.* 2018 May;265(5):1050–8.
32. Oh Y-S, Kim J-S, Park I-S, Shim Y-S, Song I-U, Park J-W, et al. Prevalence and treatment pattern of Parkinson's disease dementia in Korea. *Geriatr Gerontol Int.* 2016 Feb;16(2):230–6.
33. Okada K, Kobayashi S, Tsunematsu T. Prevalence of Parkinson's disease in Izumo City, Japan. *Gerontology.* 1990;36(5–6):340–4.
34. Oyeboode JR, Barker WA, Blessed G, Dick DJ, Britton PG. Cognitive functioning in Parkinson's disease: in relation to prevalence of dementia and psychiatric diagnosis. *Br J Psychiatry.* 1986 Dec;149:720–5.
35. Perez F, Helmer C, Foubert-Samier A, Auriacombe S, Dartigues J-F, Tison F. Risk of dementia in an elderly population of Parkinson's disease patients: a 15-year population-based study. *Alzheimers Dement.* 2012 Nov;8(6):463–9.
36. Poletti M, Logi C, Lucetti C, Del Dotto P, Baldacci F, Vergallo A, et al. A single-center, cross-sectional prevalence study of impulse control disorders in Parkinson disease: association with dopaminergic drugs. *J Clin Psychopharmacol.* 2013 Oct;33(5):691–4.
37. Pollock M, Hornabrook RW. The prevalence, natural history and dementia of Parkinson's disease. *Brain.* 1966 Sep;89(3):429–48.

38. Rana AQ, Vaid HM, Edun A, Dogu O, Rana MA. Relationship of dementia and visual hallucinations in tremor and non-tremor dominant Parkinson's disease. *J Neurol Sci.* 2012 Dec;323(1–2):158–61.
39. Riedel O, Heuser I, Klotsche J, Dodel R, Wittchen H-U, GEPAD Study Group. Occurrence risk and structure of depression in Parkinson disease with and without dementia: results from the GEPAD Study. *J Geriatr Psychiatry Neurol.* 2010 Mar;23(1):27–34.
40. Rosdinom R, Fazli A, Ruzyanei NJN, Azlin B, Srijit D. Factors associated with cognitive impairment in patients with Parkinson disease: an urban study. *Clin Ter.* 2011;162(1):23–9.
41. Sanyal J, Banerjee TK, Rao VR. Dementia and cognitive impairment in patients with Parkinson's disease from India: a 7-year prospective study. *Am J Alzheimers Dis Other Demen.* 2014 Nov;29(7):630–6.
42. Savica R, Grossardt BR, Rocca WA, Bower JH. Parkinson disease with and without Dementia: A prevalence study and future projections. *Mov Disord.* 2018;33(4):537–43.
43. Schrag A, Jahanshahi M, Quinn N. What contributes to quality of life in patients with Parkinson's disease? *J Neurol Neurosurg Psychiatry.* 2000 Sep;69(3):308–12.
44. Szewczyk-Krolikowski K, Tomlinson P, Nithi K, Wade-Martins R, Talbot K, Ben-Shlomo Y, et al. The influence of age and gender on motor and non-motor features of early Parkinson's disease: initial findings from the Oxford Parkinson Disease Center (OPDC) discovery cohort. *Parkinsonism Relat Disord.* 2014 Jan;20(1):99–105.
45. Tanaka R, Shimo Y, Yamashiro K, Ogawa T, Nishioka K, Oyama G, et al. Association between abnormal nocturnal blood pressure profile and dementia in Parkinson's disease. *Parkinsonism Relat Disord.* 2018;46:24–9.
46. Tiple D, Fabbri G, Colosimo C, Ottaviani D, Camerota F, Defazio G, et al. Camptocormia in Parkinson disease: an epidemiological and clinical study. *J Neurol Neurosurg Psychiatry.* 2009 Feb;80(2):145–8.
47. Wang SJ, Fuh JL, Teng EL, Liu CY, Lin KP, Chen HM, et al. A door-to-door survey of Parkinson's disease in a Chinese population in Kinmen. *Arch Neurol.* 1996 Jan;53(1):66–71.
48. Wang Y, Tang B, Yan X, Chen Z, Xu Q, Liu Z, et al. A neurophysiological profile in Parkinson's disease with mild cognitive impairment and dementia in China. *J Clin Neurosci.* 2015 Jun;22(6):981–5.
49. Wei Y-JJ, Stuart B, Zuckerman IH. Use of antiparkinson medications among elderly Medicare beneficiaries with Parkinson's disease. *Am J Geriatr Pharmacother.* 2010 Aug;8(4):384–94.
50. A community survey of Parkinson's disease - PubMed [Internet]. [cited 2020 Aug 18]. Available from: <https://pubmed-ncbi-nlm-nih-gov.offcampus.lib.washington.edu/2766181/>

## Down Syndrome

1. Bayen E, Possin KL, Chen Y, Cleret de Langavant L, Yaffe K. Prevalence of Aging, Dementia, and Multimorbidity in Older Adults With Down Syndrome. *JAMA Neurol.* 2018 01;75(11):1399–406.
2. Cole JH, Annus T, Wilson LR, Remtulla R, Hong YT, Fryer TD, et al. Brain-predicted age in Down syndrome is associated with beta amyloid deposition and cognitive decline. *Neurobiol Aging.* 2017;56:41–9.
3. Coppus A, Evenhuis H, Verberne G-J, Visser F, van Gool P, Eikelenboom P, et al. Dementia and mortality in persons with Down's syndrome. *J Intellect Disabil Res.* 2006 Oct;50(Pt 10):768–77.

4. Cosgrave MP, Tyrrell J, McCarron M, Gill M, Lawlor BA. Age at onset of dementia and age of menopause in women with Down's syndrome. *J Intellect Disabil Res.* 1999 Dec;43 ( Pt 6):461–5.
5. Fonseca LM, Haddad GG, Mattar GP, Oliveira MC de, Simon SS, Guilhoto LM, et al. The validity and reliability of the CAMDEX-DS for assessing dementia in adults with Down syndrome in Brazil. *Braz J Psychiatry.* 2019 Jun;41(3):225–33.
6. Guffroy A, Dieudonné Y, Uring-Lambert B, Goetz J, Alembik Y, Korganow A-S. Infection risk among adults with down syndrome: a two group series of 101 patients in a tertiary center. *Orphanet J Rare Dis.* 2019 11;14(1):15.
7. Hithersay R, Startin CM, Hamburg S, Mok KY, Hardy J, Fisher EMC, et al. Association of Dementia With Mortality Among Adults With Down Syndrome Older Than 35 Years. *JAMA Neurol.* 2019 01;76(2):152–60.
8. Holland AJ, Hon J, Huppert FA, Stevens F, Watson P. Population-based study of the prevalence and presentation of dementia in adults with Down's syndrome. *Br J Psychiatry.* 1998 Jun;172:493–8.
9. Johannsen P, Christensen JE, Mai J. The prevalence of dementia in Down syndrome. *Dementia.* 1996 Aug;7(4):221–5.
10. Lai F, Williams RS. A prospective study of Alzheimer disease in Down syndrome. *Arch Neurol.* 1989 Aug;46(8):849–53.
11. Landt J, Ball SL, Holland AJ, Hon J, Owen A, Treppner P, et al. Age-related changes in plasma dehydroepiandrosterone levels in adults with Down's syndrome and the risk of dementia. *J Neuroendocrinol.* 2011 May;23(5):450–5.
12. Mantry D, Cooper S-A, Smiley E, Morrison J, Allan L, Williamson A, et al. The prevalence and incidence of mental ill-health in adults with Down syndrome. *J Intellect Disabil Res.* 2008 Feb;52(Pt 2):141–55.
13. Myers BA, Pueschel SM. Psychiatric disorders in persons with Down syndrome. *J Nerv Ment Dis.* 1991 Oct;179(10):609–13.
14. Prasher VP, Chung MC. Causes of age-related decline in adaptive behavior of adults with Down syndrome: differential diagnoses of dementia. *Am J Ment Retard.* 1996 Sep;101(2):175–83.
15. Prasher VP, Sajith SG, Mehta P, Zigman WB, Schupf N. Plasma beta-amyloid and duration of Alzheimer's disease in adults with Down syndrome. *Int J Geriatr Psychiatry.* 2010 Feb;25(2):202–7.
16. Royston MC, Mann D, Pickering-Brown S, Owen F, Perry R, Raghavan R, et al. Apolipoprotein E epsilon 2 allele promotes longevity and protects patients with Down's syndrome from dementia. *Neuroreport.* 1994 Dec;5(18):2583–5.
17. Sauna-Aho O, Bjelogrić-Laakso N, Siren A, Arvio M. Signs indicating dementia in Down, Williams and Fragile X syndromes. *Mol Genet Genomic Med.* 2018;6(5):855–60.
18. Sekijima Y, Ikeda S, Tokuda T, Satoh S, Hidaka H, Hidaka E, et al. Prevalence of dementia of Alzheimer type and apolipoprotein E phenotypes in aged patients with Down's syndrome. *Eur Neurol.* 1998;39(4):234–7.
19. Sobey CG, Judkins CP, Sundararajan V, Phan TG, Drummond GR, Srikanth VK. Risk of Major Cardiovascular Events in People with Down Syndrome. *PLoS ONE.* 2015;10(9):e0137093.
20. Strydom A, Heslegrave A, Startin CM, Mok KY, Hardy J, Groet J, et al. Neurofilament light as a blood biomarker for neurodegeneration in Down syndrome. *Alzheimers Res Ther.* 2018 10;10(1):39.

21. Temple V, Jozsvai E, Konstantareas MM, Hewitt TA. Alzheimer dementia in Down's syndrome: the relevance of cognitive ability. *J Intellect Disabil Res.* 2001 Feb;45(Pt 1):47–55.
22. Tyrrell J, Cosgrave M, McCarron M, McPherson J, Calvert J, Kelly A, et al. Dementia in people with Down's syndrome. *Int J Geriatr Psychiatry.* 2001 Dec;16(12):1168–74.
23. Uppal H, Chandran S, Potluri R. Risk factors for mortality in Down syndrome. *J Intellect Disabil Res.* 2015 Sep;59(9):873–81.
24. van Schrojenstein Lantman-de Valk HM, van den Akker M, Maaskant MA, Haveman MJ, Urlings HF, Kessels AG, et al. Prevalence and incidence of health problems in people with intellectual disability. *J Intellect Disabil Res.* 1997 Feb;41 ( Pt 1):42–51.
25. Walsh DM, Doran E, Silverman W, Tournay A, Movsesyan N, Lott IT. Rapid assessment of cognitive function in down syndrome across intellectual level and dementia status. *J Intellect Disabil Res.* 2015 Nov;59(11):1071–9.

## Stroke

1. Nakahori N, Sekine M, Yamada M, Tatsuse T, Kido H, Suzuki M. A pathway from low socioeconomic status to dementia in Japan: results from the Toyama dementia survey. *BMC Geriatr.* 2018 27;18(1):102.
2. Hsu P-F, Pan W-H, Yip B-S, Chen RC-Y, Cheng H-M, Chuang S-Y. C-Reactive Protein Predicts Incidence of Dementia in an Elderly Asian Community Cohort. *J Am Med Dir Assoc.* 2017 Mar;18(3):277.e7-277.e11.
3. Hobson P, Meara J. Cognitive function and mortality in a community-based elderly cohort of first-ever stroke survivors and control subjects. *J Stroke Cerebrovasc Dis.* 2010 Oct;19(5):382–7.
4. Ivan CS, Seshadri S, Beiser A, Au R, Kase CS, Kelly-Hayes M, et al. Dementia after stroke: the Framingham Study. *Stroke.* 2004 Jun;35(6):1264–8.
5. Kim J-H, Lee Y. Dementia and Death After Stroke in Older Adults During a 10-year Follow-up: Results from a Competing Risk Model. *J Nutr Health Aging.* 2018;22(2):297–301.
6. Zahodne LB, Schupf N, Brickman AM, Mayeux R, Wall MM, Stern Y, et al. Dementia Risk and Protective Factors Differ in the Context of Memory Trajectory Groups. *J Alzheimers Dis.* 2016 12;52(3):1013–20.
7. Barnes DE, Beiser AS, Lee A, Langa KM, Koyama A, Preis SR, et al. Development and validation of a brief dementia screening indicator for primary care. *Alzheimers Dement.* 2014 Nov;10(6):656-665.e1.
8. Dregan A, Wolfe CDA, Gulliford MC. Does the influence of stroke on dementia vary by different levels of prestroke cognitive functioning?: a cohort study. *Stroke.* 2013 Dec;44(12):3445–51.
9. Gamaldo A, Moghekar A, Kilada S, Resnick SM, Zonderman AB, O'Brien R. Effect of a clinical stroke on the risk of dementia in a prospective cohort. *Neurology.* 2006 Oct;67(8):1363–9.
10. Zhu L, Fratiglioni L, Guo Z, Basun H, Corder EH, Winblad B, et al. Incidence of dementia in relation to stroke and the apolipoprotein E epsilon4 allele in the very old. Findings from a population-based longitudinal study. *Stroke.* 2000 Jan;31(1):53–60.
11. Noale M, Limongi F, Zambon S, Crepaldi G, Maggi S, ILSA Working Group. Incidence of dementia: evidence for an effect modification by gender. The ILSA Study. *Int Psychogeriatr.* 2013 Nov;25(11):1867–76.
12. Chen R, Hu Z, Wei L, Ma Y, Liu Z, Copeland JR. Incident dementia in a defined older Chinese population. *PLoS ONE.* 2011;6(9):e24817.

13. Tsai H-H, Yen R-F, Lin C-L, Kao C-H. Increased risk of dementia in patients hospitalized with acute kidney injury: A nationwide population-based cohort study. *PLoS ONE*. 2017;12(2):e0171671.
14. Jin YP, Østbye T, Feightner JW, Di Legge S, Hachinski V. Joint effect of stroke and APOE 4 on dementia risk: the Canadian Study of Health and Aging. *Neurology*. 2008 Jan;70(1):9–16.
15. Simons LA, Simons J, McCallum J, Friedlander Y. Lifestyle factors and risk of dementia: Dubbo Study of the elderly. *Med J Aust*. 2006 Jan;184(2):68–70.
16. Srikanth Velandai K., Quinn Stephen J., Donnan Geoffrey A., Saling Michael M., Thrift Amanda G. Long-Term Cognitive Transitions, Rates of Cognitive Change, and Predictors of Incident Dementia in a Population-Based First-Ever Stroke Cohort. *Stroke*. 2006 Oct;37(10):2479–83.
17. Corraini P, Henderson VW, Ording AG, Pedersen L, Horváth-Puhó E, Sørensen HT. Long-Term Risk of Dementia Among Survivors of Ischemic or Hemorrhagic Stroke. *Stroke*. 2017;48(1):180–6.
18. Downer B, Kumar A, Veeranki SP, Mehta HB, Raji M, Markides KS. Mexican-American Dementia Nomogram: Development of a Dementia Risk Index for Mexican-American Older Adults. *J Am Geriatr Soc*. 2016;64(12):e265–9.
19. Hassing LB, Dahl AK, Thorvaldsson V, Berg S, Gatz M, Pedersen NL, et al. Overweight in midlife and risk of dementia: a 40-year follow-up study. *Int J Obes (Lond)*. 2009 Aug;33(8):893–8.
20. Walters K, Hardoon S, Petersen I, Iliffe S, Omar RZ, Nazareth I, et al. Predicting dementia risk in primary care: development and validation of the Dementia Risk Score using routinely collected data. *BMC Med*. 2016 Jan;14:6.
21. Srikanth VK, Anderson JFI, Donnan GA, Saling MM, Didus E, Alpitsis R, et al. Progressive dementia after first-ever stroke: a community-based follow-up study. *Neurology*. 2004 Sep;63(5):785–92.
22. Ganguli M, Lee C-W, Snitz BE, Hughes TF, McDade E, Chang C-CH. Rates and risk factors for progression to incident dementia vary by age in a population cohort. *Neurology*. 2015 Jan;84(1):72–80.
23. Kuller LH, Lopez OL, Newman A, Beauchamp NJ, Burke G, Dulberg C, et al. Risk factors for dementia in the cardiovascular health cognition study. *Neuroepidemiology*. 2003 Feb;22(1):13–22.
24. Yip AG, Brayne C, Matthews FE, MRC Cognitive Function and Ageing Study. Risk factors for incident dementia in England and Wales: The Medical Research Council Cognitive Function and Ageing Study. A population-based nested case-control study. *Age Ageing*. 2006 Mar;35(2):154–60.
25. Nordström P, Nordström A, Eriksson M, Wahlund L-O, Gustafson Y. Risk factors in late adolescence for young-onset dementia in men: a nationwide cohort study. *JAMA Intern Med*. 2013 Sep;173(17):1612–8.
26. Dodge HH, Chang C-CH, Kamboh IM, Ganguli M. Risk of Alzheimer's disease incidence attributable to vascular disease in the population. *Alzheimers Dement*. 2011 May;7(3):356–60.
27. Hendrie HC, Hake A, Lane K, Purnell C, Unverzagt F, Smith-Gamble V, et al. Statin Use, Incident Dementia and Alzheimer Disease in Elderly African Americans. *Ethn Dis*. 2015 Aug;25(3):345–54.
28. Liebetrau M, Steen B, Skoog I. Stroke in 85-year-olds: prevalence, incidence, risk factors, and relation to mortality and dementia. *Stroke*. 2003 Nov;34(11):2617–22.



29. de Bruijn RFAG, Bos MJ, Portegies MLP, Hofman A, Franco OH, Koudstaal PJ, et al. The potential for prevention of dementia across two decades: the prospective, population-based Rotterdam Study. *BMC Med.* 2015 Jul;13:132.
30. Jin Y-P, Di Legge S, Ostbye T, Feightner JW, Hachinski V. The reciprocal risks of stroke and cognitive impairment in an elderly population. *Alzheimers Dement.* 2006 Jul;2(3):171–8.
31. Rastas S, Pirttilä T, Mattila K, Verkkoniemi A, Juva K, Niinistö L, et al. Vascular risk factors and dementia in the general population aged >85 years: prospective population-based study. *Neurobiol Aging.* 2010 Jan;31(1):1–7.
32. Hayden KM, Zandi PP, Lyketsos CG, Khachaturian AS, Bastian LA, Charoonruk G, et al. Vascular risk factors for incident Alzheimer disease and vascular dementia: the Cache County study. *Alzheimer Dis Assoc Disord.* 2006 Jun;20(2):93–100.
33. Qiu C, Xu W, Winblad B, Fratiglioni L. Vascular risk profiles for dementia and Alzheimer’s disease in very old people: a population-based longitudinal study. *J Alzheimers Dis.* 2010;20(1):293–300.
34. Brayne C, Gill C, Huppert FA, Barkley C, Gehlhaar E, Girling DM, et al. Vascular risks and incident dementia: results from a cohort study of the very old. *Dement Geriatr Cogn Disord.* 1998 Jun;9(3):175–80.

## 573 Study characteristics table

574

| Disease                    | Study Characteristic               | Level                                      | Count (%)  |
|----------------------------|------------------------------------|--------------------------------------------|------------|
| <b>Down syndrome</b>       | Outcome category (%)               | Alzheimer's disease                        | 5 (19.2)   |
|                            |                                    | DSM/ICD dementia                           | 21 (80.8)  |
|                            | Sample assessed (%)                | Assessed hospital sample                   | 3 (11.5)   |
|                            |                                    | Assessed other sample                      | 23 (88.5)  |
|                            | Dementia diagnosis method (%)      | Diagnosed by study physician or alternate  | 22 (84.6)  |
|                            |                                    | Diagnosed with clinical records            | 4 (15.4)   |
| <b>Parkinson's disease</b> | Outcome category (%)               | All cognitive impairment                   | 6 (9.4)    |
|                            |                                    | DSM/ICD dementia                           | 37 (57.8)  |
|                            |                                    | Mild cognitive impairment                  | 13 (20.3)  |
|                            |                                    | Parkinson's disease dementia               | 8 (12.5)   |
|                            | Sample assessed (%)                | Assessed clinical sample                   | 40 (62.5)  |
|                            |                                    | Assessed population representative sample  | 24 (37.5)  |
|                            | Dementia diagnosis method (%)      | Diagnosed by study physician or alternate  | 58 (90.6)  |
|                            |                                    | Diagnosed with clinical records            | 6 (9.4)    |
| <b>Stroke</b>              | Exposure category (%)              | Stroke                                     | 34 (82.9)  |
|                            |                                    | Stroke and TIA combined                    | 7 (17.1)   |
|                            | Timing of stroke ascertainment (%) | Incident stroke                            | 12 (100.0) |
|                            | Stroke reporting (%)               | Confirmed stroke                           | 21 (51.2)  |
|                            |                                    | Self reported stroke                       | 20 (48.8)  |
|                            | Use of clinical records (%)        | Stroke identified with clinical records    | 12 (29.3)  |
|                            |                                    | Stroke identified without clinical records | 29 (70.7)  |
|                            | Study design (%)                   | Case-control study                         | 4 (9.8)    |
|                            |                                    | Longitudinal study                         | 37 (90.2)  |
|                            | Sample assessed (%)                | Assessed clinical sample                   | 1 (2.4)    |
|                            |                                    | Assessed population representative sample  | 40 (97.6)  |
|                            | Dementia diagnosis method (%)      | Diagnosed by study physician or alternate  | 34 (82.9)  |
|                            |                                    | Diagnosed with clinical records            | 7 (17.1)   |
|                            | Controlled for age and sex (%)     | Controlled                                 | 35 (85.4)  |
|                            |                                    | Did not control                            | 6 (14.6)   |

| Disease    | Study Characteristic                            | Level                                                 | Count (%) |
|------------|-------------------------------------------------|-------------------------------------------------------|-----------|
|            | Controlled for education (%)                    | Controlled                                            | 21 (51.2) |
|            |                                                 | Did not control                                       | 20 (48.8) |
|            | Controlled for other cardiovascular disease (%) | Controlled                                            | 17 (41.5) |
|            |                                                 | Did not control                                       | 24 (58.5) |
| <b>TBI</b> | Outcome category (%)                            | Alzheimer's disease                                   | 32 (56.1) |
|            |                                                 | DSM/ICD Dementia                                      | 25 (43.9) |
|            | Dementia diagnosis method (%)                   | Diagnosed by study physician or alternate             | 43 (75.4) |
|            |                                                 | Diagnosed with clinical records                       | 14 (24.6) |
|            | Two-phase dementia ascertainment (%)            | No, one stage diagnostic procedure                    | 35 (61.4) |
|            |                                                 | Yes, screening completed                              | 22 (38.6) |
|            | TBI reporting (%)                               | Self reported TBI                                     | 41 (71.9) |
|            |                                                 | TBI ascertained through physician or clinical records | 16 (28.1) |
|            | TBI intensity (%)                               | All TBI                                               | 20 (35.1) |
|            |                                                 | Lost consciousness or sought medical treatment        | 37 (64.9) |
|            | Study design (%)                                | Case-control study                                    | 33 (57.9) |
|            |                                                 | Longitudinal study                                    | 24 (42.1) |
|            | Controlled for age and sex (%)                  | Controlled                                            | 51 (89.5) |
|            |                                                 | Did not control                                       | 6 (10.5)  |
|            | Controlled for education (%)                    | Controlled                                            | 24 (42.1) |
|            |                                                 | Did not control                                       | 33 (57.9) |
|            | Controlled for cardiovascular disease (%)       | Controlled                                            | 10 (17.5) |
|            |                                                 | Did not control                                       | 47 (82.5) |

\*The number of studies for Down's syndrome and Parkinson's disease do not match the number of studies reported in the paper, as some studies reported multiple data points with different study attributes, and these are counted distinctly here.

575  
576  
577  
578  
579  
580

## Bayesian meta-regression model settings

In our models for the estimation of relative risks, we specified that covariates on study characteristics effected both the mean effect and the variance of the estimate. Gaussian priors of zero effect with a variance of 0.01 were included for each covariate on study characteristics in order to prevent the model from estimating spuriously large effect sizes when informed by sparse data. For each model, we tested a covariate on sex, but as the majority of data extracted were not sex-specific, we did not find a relationship between sex and relative risk in any of the models and the covariate was excluded. To estimate relative risk over age, we included a cubic splines on age with three knots, equally spaced across the distribution of data over age. Each spline had priors on the slope of the terminal segments, to prevent undue influence of sparse data towards the tails of the spline.

## Bayesian meta-regression methods

(Reprinted from “Global burden of 369 diseases, injuries, and impairments, 1990–2019: a systematic analysis for the Global Burden of Disease Study 2019” by GBD 2019 Diseases, Injuries, and Impairments Collaborators, in press)

This section details the statistical models underlying MR-BRT, and the fitting procedure used to obtain estimates. Further details on models and algorithms can be found in the technical report.<sup>1</sup>

The MR-BRT program is a set of wrappers customised for global health problems that use the open-source mixed effects package `LimeTr` (<https://github.com/zhengp0/limetr>).<sup>1</sup> We describe the basic functionality in the sections below.

### Mixed-effects model

We consider the following non-linear mixed effects model:

$$\begin{aligned} \mathbf{y}_i &= \mathbf{F}_i(\boldsymbol{\beta}) + \mathbf{Z}_i \mathbf{u}_i + \boldsymbol{\epsilon}_i \\ \mathbf{u}_i &\sim N(\mathbf{0}, \boldsymbol{\Gamma}), \quad \boldsymbol{\Gamma} = \text{diag}(\boldsymbol{\gamma}), \quad \boldsymbol{\epsilon}_i \sim N(\mathbf{0}, \boldsymbol{\Lambda}), \end{aligned} \quad (1)$$

where  $\mathbf{y}_i \in \mathbb{R}^{n_i}$  is the vector of observations from the  $i$ th study,  $\boldsymbol{\epsilon}_i \in \mathbb{R}^{n_i}$  are measurement errors with given covariance  $\boldsymbol{\Lambda}$ ,  $\mathbf{u}_i \in \mathbb{R}^{k_y}$  are independent random effects, and  $\mathbf{Z}_i \in \mathbb{R}^{n_i \times k_y}$  is a linear map, and  $\boldsymbol{\beta}$  are regression coefficients. The models  $\mathbf{F}_i$  may be non-linear.

To fit  $(\boldsymbol{\beta}, \boldsymbol{\gamma})$  we solve the marginal likelihood problem:

$$\min_{\boldsymbol{\beta}, \boldsymbol{\gamma}} f(\boldsymbol{\beta}, \boldsymbol{\gamma}) := \sum_{i=1}^m \frac{1}{2} (\mathbf{y}_i - \mathbf{F}_i(\boldsymbol{\beta}))^\top (\mathbf{Z}_i \boldsymbol{\Gamma} \mathbf{Z}_i^\top + \boldsymbol{\Lambda}_i)^{-1} (\mathbf{y}_i - \mathbf{F}_i(\boldsymbol{\beta})) + \frac{1}{2} \ln |\mathbf{Z}_i \boldsymbol{\Gamma} \mathbf{Z}_i^\top + \boldsymbol{\Lambda}_i|. \quad (2)$$

When the model is linear, we can write:

$$\mathbf{F}_i(\boldsymbol{\beta}) = \mathbf{X}_i \boldsymbol{\beta}. \quad (3)$$

### Constraints and priors

The ML estimate can be extended to incorporate non-linear inequality constraints

$$\mathbf{C}(\boldsymbol{\theta}) \leq \mathbf{c},$$

where  $\boldsymbol{\theta} = (\boldsymbol{\beta}, \boldsymbol{\gamma})$ . Constraints play a key role for polynomial splines.

It is also essential to allow priors on parameters of interest. We assume that priors are given by a functional form

$$\boldsymbol{\theta} \sim \exp(-\rho(\boldsymbol{\theta}))$$

The likelihood problem is then augmented by adding the term  $(\boldsymbol{\theta})$  to the ML objective. The function  $\rho$  may be non-linear and non-convex, but we assume it is smooth.

### Trimming outliers

Least trimmed squares (LTS) is a robust estimator<sup>2,3</sup> for the standard regression problem. Given the problem

$$\min_{\beta} \sum_{i=1}^n \frac{1}{2} (y_i - \langle \mathbf{X}_i, \beta \rangle)^2, \quad (4)$$

638

639 the LTS estimator minimises the sum of *smallest*  $h$  residuals rather than all residuals. These estimators  
 640 were initially introduced to develop linear regression estimators that have a high breakdown point (in  
 641 this case 50%) and good statistical efficiency (in this case  $n^{-1/2}$ ). Breakdown refers to the percentage of  
 642 outlying points which can be added to a dataset before the resulting M-estimator can change in an  
 643 unbounded way. Here, outliers can affect both the outcomes and training data (features).

644 LTS estimators are robust against outliers, and arbitrarily large deviations that are trimmed do not affect  
 645 the final  $\beta$ .

646 Rather than writing the objective in terms of order statistics, it is far simpler to extend the likelihood  
 647 using an auxiliary variable  $\mathbf{W}$ :

$$\min_{\beta, \mathbf{W}} \sum_{i=1}^n w_i \frac{1}{2} (y_i - \langle \mathbf{X}_i, \beta \rangle)^2 \quad \text{s.t.} \quad \mathbf{1}^\top \mathbf{W} = h, \quad \mathbf{0} \leq \mathbf{W} \leq \mathbf{1}. \quad (5)$$

648 The set

$$\Delta_h := \{\mathbf{W} : \mathbf{1}^\top \mathbf{W} = h, \quad \mathbf{0} \leq \mathbf{W} \leq \mathbf{1}\} \quad (6)$$

649 is known as the *capped simplex*, since it is the intersection of the  $h$ -simplex with the unit box.<sup>2</sup> For a  
 650 fixed  $\beta$ , the optimal solution of (5) with respect to  $\mathbf{W}$  assigns weight 1 to each of the smallest  $h$   
 651 residuals, and 0 to the rest. Problem (5) is solved *jointly* in  $(\beta, \mathbf{W})$ , simultaneously finding the regression  
 652 estimate and classifying the observations into inliers and outliers. This joint strategy makes LTS different  
 653 from post-hoc analysis, where a model is fit first with all data, and then outliers are detected using that  
 654 estimate.

655 To explain how trimming enters the marginal likelihood problem, we focus on a single group term from  
 656 the ML likelihood (2):

$$\left( \frac{1}{2} (\mathbf{y}_i - \mathbf{F}_i(\beta))^\top (\mathbf{Z}_i \Gamma^{-1} \mathbf{Z}_i^\top + \Lambda_i)^{-1} (\mathbf{y}_i - \mathbf{F}_i(\beta)) + \frac{1}{2} \ln |\mathbf{Z}_i \Gamma^{-1} \mathbf{Z}_i^\top + \Lambda_i| \right)$$

657

658 We introduce auxiliary variables  $\mathbf{W}_i \in \mathbb{R}^{n_i}$ , and define

$$\mathbf{r}_i := \mathbf{y}_i - \mathbf{F}_i(\beta), \quad \mathbf{W}_i := \text{diag}(\mathbf{W}_i), \quad \sqrt{\mathbf{W}_i} := \text{diag}(\sqrt{\mathbf{W}_i}).$$

659

660 We now form the objective

$$\frac{1}{2} \mathbf{r}_i^\top \sqrt{\mathbf{W}_i} \left( \sqrt{\mathbf{W}_i} \mathbf{Z}_i \Gamma^{-1} \mathbf{Z}_i^\top \sqrt{\mathbf{W}_i} + \Lambda_i^{\odot \mathbf{W}_i} \right)^{-1} \sqrt{\mathbf{W}_i} \mathbf{r}_i + \frac{1}{2} \ln \left| \sqrt{\mathbf{W}_i} \mathbf{Z}_i \Gamma^{-1} \mathbf{Z}_i^\top \sqrt{\mathbf{W}_i} + \Lambda_i^{\odot \mathbf{W}_i} \right|, \quad (7)$$

661

662 where  $\odot$  denotes the elementwise power operation:

$$\Lambda_i^{\odot \mathbf{W}_i} := \begin{bmatrix} (\lambda_{1j})^{w_{11}} & 0 & \dots & 0 \\ 0 & \ddots & \ddots & \vdots \\ 0 & \dots & 0 & (\lambda_{in_i})^{w_{in_i}} \end{bmatrix} \quad (8)$$

663 When  $w_{ij} = 1$ , we recover the contribution of the  $ij$ th observation to the original likelihood. As  $w_{ij} \downarrow 0$ ,  
 664 the  $ij$ th contribution to the residual is correctly eliminated by  $\sqrt{w_{ij}} \downarrow 0$ . The  $j$ th row and column of

665  $\sqrt{\mathbf{W}_i} \mathbf{Z}_i \Gamma^{-1} \mathbf{Z}_i^T \sqrt{\mathbf{W}_i}$  both go to 0, while the  $j$ th entry of  $\Lambda_i \odot$  goes to 1, which effectively removes all  
 666 impact of the  $j$ th point on the covariance matrix.

667 For full details and analysis, please see the technical report.<sup>1</sup>

## 668 Final estimator

669 Putting together the trimmed ML with priors and constraints, we arrive at the following estimator.

$$\begin{aligned} \min_{\beta, \gamma, \mathbf{W}} f(\beta, \gamma, \mathbf{W}) &:= \sum_{i=1}^m \frac{1}{2} r_i^T \sqrt{\mathbf{W}_i} \left( \sqrt{\mathbf{W}_i} \mathbf{Z}_i \Gamma^{-1} \mathbf{Z}_i^T \sqrt{\mathbf{W}_i} + \Lambda_i^{\odot \mathbf{W}_i} \right)^{-1} \\ &\quad \sqrt{\mathbf{W}_i} r_i + \frac{1}{2} \ln |\sqrt{\mathbf{W}_i} \mathbf{Z}_i \Gamma^{-1} \mathbf{Z}_i^T \sqrt{\mathbf{W}_i} + \Lambda_i^{\odot \mathbf{W}_i}| + \rho(\beta, \gamma, \Lambda) \\ \text{s.t. } r_i &= y_i - \mathbf{F}_i(\beta), \quad \mathbf{1}^T \mathbf{W} = h, \quad 0 \leq \mathbf{W} \leq 1, \quad c\left(\frac{\beta}{\gamma}\right) \leq c. \end{aligned} \quad (9)$$

670 The fit is obtained using iterative optimisation techniques. Problem (9) is non-linear and non-smooth,  
 671 and the optimisation is implemented in the `LimeTR` package<sup>4</sup> (<https://github.com/zhengp0>), and relies  
 672 on the IPopt interior point method.<sup>5</sup>

## 673 Non-linear dose-response curves with constrained splines

674 In this section we discuss spline models for dose-response relationships. General background on splines  
 675 and spline regression are available elsewhere.<sup>6,7</sup>

### 676 B-splines and bases

677 A spline basis is a set of piecewise polynomial functions with designated degree and domain. If we  
 678 denote polynomial order by  $p$ , and the number of knots by  $k$ , we need  $p+k$  basis elements  $s_{jp}$ , which  
 679 can be generated recursively as illustrated in Figure A.

680 Figure A. Recursive generation of b-spline basis elements (orders 0, 1, 2)

681

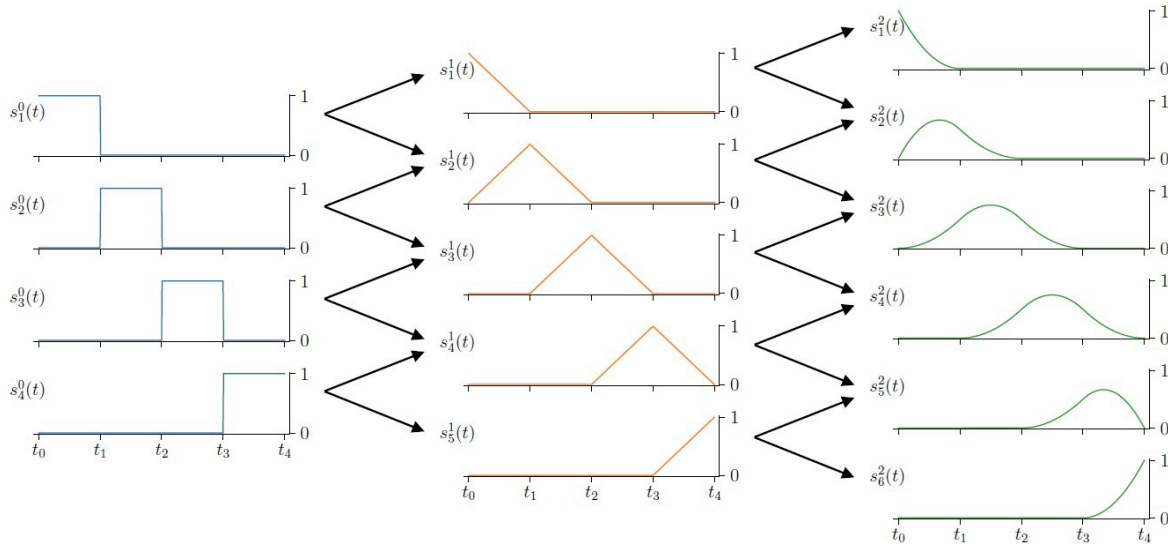

682 Given such a basis, we can represent any dose-response relationship as the linear combination of the  
 683 spline basis elements, with coefficients  $\beta \in \mathbb{R}^{p+k}$ :

$$f(t) = \sum_{j=1}^{p+k} \beta_j^p s_j^p(t). \quad (10)$$

These coefficients are then inferred as part of the general estimator (9) as discussed in the previous section. An explicit representation of (11) is obtained by building a design matrix  $\mathbf{X}$ . Given a set of  $t$  values at which we have data, the  $j$ th column of  $\mathbf{X}$  is given by the expression

$$\mathbf{X}_{\cdot j} = \begin{bmatrix} s_j^p(t_0) \\ \vdots \\ s_j^p(t_k) \end{bmatrix}. \quad (11)$$

The model for direct observations data coming from (11) can now be written compactly as

$$\mathbf{y} = \mathbf{X}\beta + \mathbf{Z}\mathbf{u} + \boldsymbol{\epsilon},$$

which is a special case of the main problem class (1).

### Shape constraints

We can impose shape constraints such as monotonicity, concavity, and convexity on splines. Constraints on splines have been developed in the past through reformulation techniques.<sup>8</sup> The development in this section uses explicit constraints instead.

**Monotonicity.** Spline monotonicity across the domain of interest follows from monotonicity of the spline coefficients.<sup>6</sup> Given coefficients

$$\beta = \begin{bmatrix} \beta_1 \\ \vdots \\ \beta_n \end{bmatrix},$$

the curve  $f(t)$  is monotonically non-decreasing when

$$\alpha_1 \leq \alpha_2 \leq \dots \leq \alpha_n$$

and monotonically non-increasing if

$$\alpha_1 \geq \alpha_2 \geq \dots \geq \alpha_n.$$

The relationship  $\alpha_1 \leq \alpha_2$  can be written as  $\alpha_1 - \alpha_2 \leq 0$ . Stacking these inequality constraints for each pair  $(\alpha_i, \alpha_{i+1})$  we can write all constraints simultaneously as

$$\underbrace{\begin{bmatrix} 1 & -1 & 0 & \dots & 0 \\ 0 & 1 & -1 & \dots & 0 \\ \vdots & \vdots & \vdots & \ddots & \vdots \\ 0 & \dots & \dots & 1 & -1 \end{bmatrix}}_{\mathbf{C}} \begin{bmatrix} \alpha_1 \\ \alpha_2 \\ \alpha_3 \\ \vdots \\ \alpha_n \end{bmatrix} \leq \begin{bmatrix} 0 \\ 0 \\ 0 \\ \vdots \\ 0 \end{bmatrix}.$$

These linear constraints are a special case of the general estimator (9) that allows  $(\beta) \leq c_\beta$ .

**Convexity and concavity.** For any twice continuously differentiable function:  $f: \mathbb{R} \rightarrow \mathbb{R}$ , convexity and concavity are captured by the signs of the second derivative. Specifically,  $f$  is convex if  $f''(t) \geq 0$  is everywhere, and concave if  $f''(t) \leq 0$  everywhere. We can compute  $f''(t)$  for each interval and impose linear inequality constraints on these expressions.



**Enforcing linear tails.** For large consumption with few data, we need the capability to ensure that the last segment of the spline is linear, with slopes that match the adjacent segment at the knot. The estimated spline is then a best fit to the data, subject to this specification. Priors on the tails can also be provided.

Figure B. Spline extrapolation. Left: linear extrapolation. Right: non-linear extrapolation.

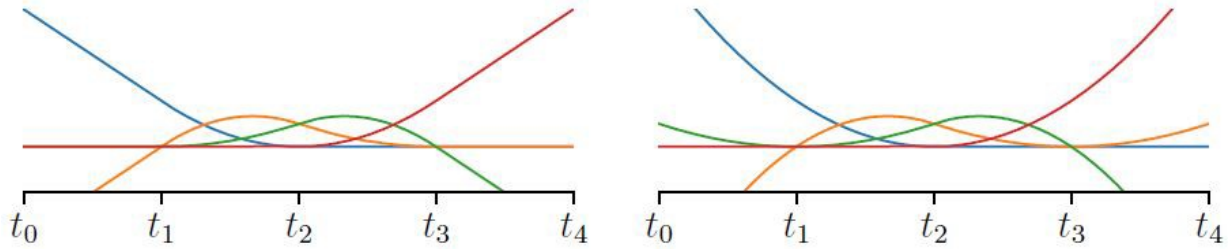

In general, using linear head and/or tail pieces to extrapolate outside the original domain or interpolate in the data-sparse region is far more stable than using higher-order polynomials; see Figure B. The figure shows symmetric linear tail modifications, but for the analyses in the paper we only impose a right linear tail shape constraint.

#### Posterior variance estimation

To obtain posterior uncertainty, we use a parametric bootstrap.<sup>9</sup> Once we solve (9) to obtain estimates  $\beta$  and  $\gamma$ , we have a model distribution of the errors (1):

$$y_i = \mathbf{F}_i(\hat{\beta}) + \mathbf{Z}_i \mathbf{u}_i + \epsilon_i$$

We sample datasets from this distribution to generate full datasets  $\{\mathbf{Y}\}^J$ , for  $j=1, \dots, J$ . For each dataset  $\mathbf{Y}_j$ , we then re-solve the fitting problem (9) to obtain estimates  $\beta_j$  and  $\gamma_j$ , and the set  $\{\beta_j, \gamma_j\}$  over all  $j$  allows us to estimate any posterior statistic we need.

In particular, the posterior set of dose-response curves is given by

$$\{f(t)_j + u_j^0\}$$

where  $f(t)_j$  is the curve obtained by using the re-fit value  $\beta_j$ , and  $u_j^0$  is a sample from  $N(0, \gamma_j^0)$ , the associated unexplained heterogeneity parameter.

## References

1. Zheng P, Aravkin AY, Barber R, Sorensen RJD, Murray CJL. Trimmed Constrained Mixed Effects Models: Formulations and Algorithms. *arXiv:1909.10700 [math, stat]* 2019; published online Sept 23. <http://arxiv.org/abs/1909.10700> (accessed Nov 15, 2019).
2. Aravkin A, Davis D. Trimmed Statistical Estimation via Variance Reduction. *Mathematics of OR* 2019; published online July 5. DOI:10.1287/moor.2019.0992.
3. Rousseeuw P. Multivariate estimation with high breakdown point. 1985. DOI:10.1007/978-94-009-5438-0\_20.
4. Forouzanfar M, Afshin A, Alexander LT, Anderson H, Bhutta Z, Murray CJL. Global, regional, and national comparative risk assessment of 79 behavioural, environmental and occupational, and metabolic risks or clusters of risks, 1990-2015: a systematic analysis for the Global Burden of Disease Study 2015. *Lancet* 2016; **388**: 1659–724.
5. Wächter A, Biegler LT. On the implementation of an interior-point filter line-search algorithm for large-scale nonlinear programming. *Math Program* 2006; **106**: 25–57.
6. Boor C de. A Practical Guide to Splines. New York: Springer-Verlag, 1978  
<https://www.springer.com/gp/book/9780387953663> (accessed Nov 15, 2019).
7. Friedman JH. Multivariate Adaptive Regression Splines. *Ann Statist* 1991; **19**: 1–67.
8. Pya N, Wood SN. Shape constrained additive models. *Stat Comput* 2015; **25**: 543–59.
9. Efron B, Tibshirani RJ. An Introduction to the Bootstrap, 1 edition. New York: Chapman and Hall/CRC, 1993.

Global Burden of Disease world regions

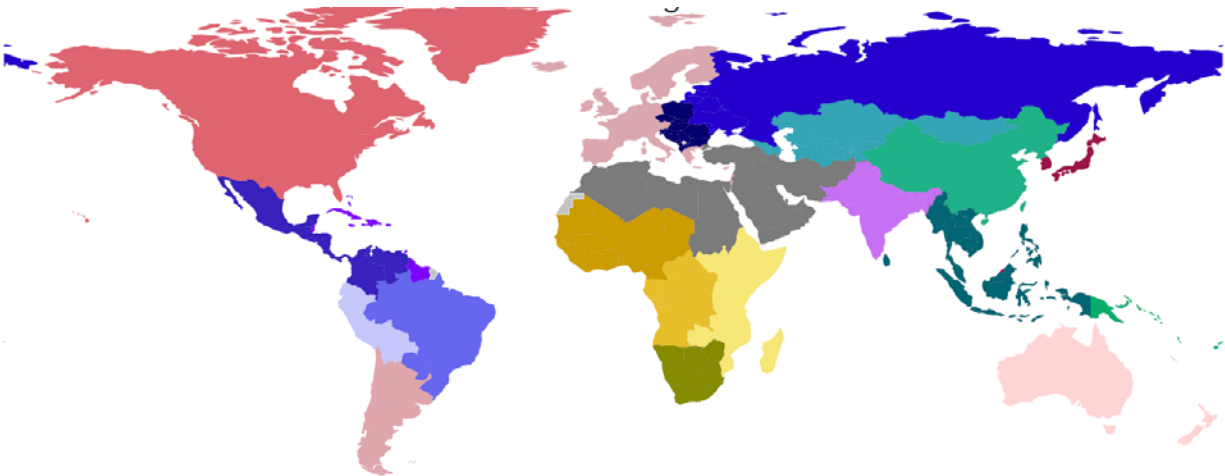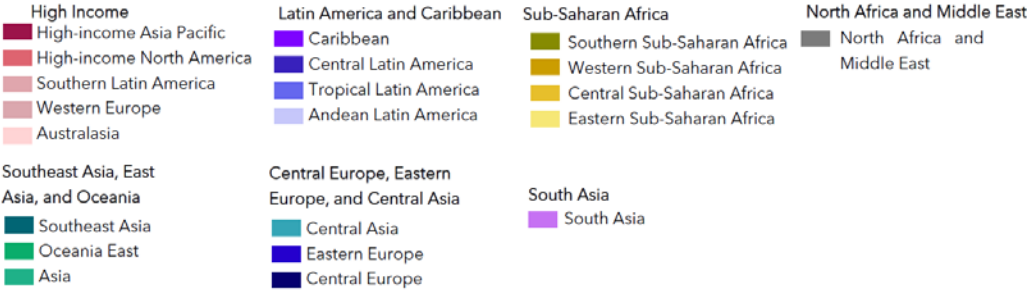

# Dementia prevalence estimation

(Reprinted from “Global burden of 369 diseases, injuries, and impairments, 1990–2019: a systematic analysis for the Global Burden of Disease Study 2019” by GBD 2019 Diseases, Injuries, and Impairments Collaborators, in press)

## Flowchart

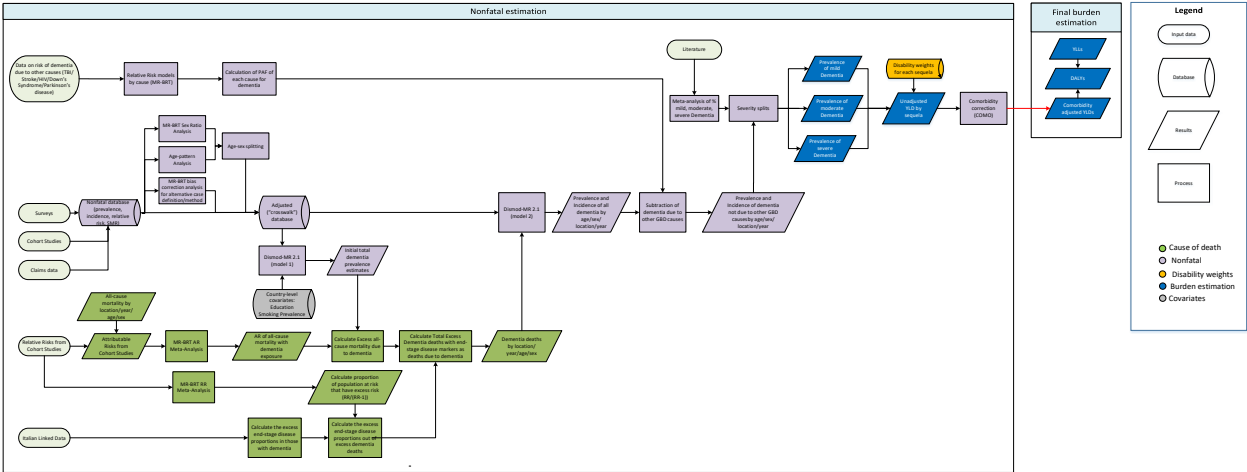

## Case definition

Dementia is a progressive, degenerative, and chronic neurological disorder typified by memory impairment and other neurological dysfunctions. For the purposes of GBD 2019, we use the Diagnostic and Statistical Manual of Mental Disorders III, IV, or V, or ICD case definitions as the reference. The DSM-IV definition is:

- Multiple cognitive deficits manifested by both memory impairment and one of the following: aphasia, apraxia, agnosia, disturbance in executive functioning
- Must cause significant impairment in occupational functioning and represent a significant decline
- Course is characterised by gradual onset and continuing cognitive decline
- Cognitive deficits are not due to other psychiatric conditions
- Deficits do not occur exclusively during the course of a delirium

A wide array of diagnostic and screening instruments exists, including Clinical Dementia Rating scale (CDR), Mini Mental State Examination (MMSE), and the Geriatric Mental State (GMS). For severity rating purposes we use the CDR as the reference. The relevant ICD-10 codes for dementia are F00, F01, F02, F03, G30, and G31. The ICD-9 codes are 290, 291.2, 291.8, 294 and 331.

Unlike most causes in the Global Burden of Disease project, dementia mortality and morbidity estimates are modelled jointly. This is because of marked discrepancies between prevalence data and cause of death data. Specifically, prevalence data suggest little to no variation over time (eg, 1990–2019), whereas age-standardised mortality rates in vital registrations in high-income countries have increased multiple times over this same period. Additionally, prevalence variation between countries is much smaller than the variation in death rates assigned to dementia in vital registration. We attribute these discrepancies to changing coding practices rather than epidemiological change.

818 Because of this joint procedure, descriptions of the mortality estimation process are included where  
819 relevant.

## 820 Input data

### 821 *Model inputs*

822 To inform our estimates of burden due to dementia, we use mortality data from vital registration  
823 systems, as well as prevalence data from surveys and administrative data such as claims sources. All data  
824 sources used in this analysis (on relative risk, prevalence, incidence, etc.) can be accessed at  
825 <http://ghdx.healthdata.org/gbd-2019/data-input-sources>.

### 826 *Item response theory for prevalence prediction*

827 The prevalence models for dementia are data-sparse, and there aren't many surveys done in low-income  
828 settings. However, there are a larger body of surveys that collect data on cognitive tests and functional  
829 limitations, which are the two main components of a DSM or ICD diagnosis. Predictions of dementia  
830 prevalence using information from these questions would allow for expanded data coverage and  
831 additional information in locations where there are currently no data guiding estimates.

832 Generating these predictions requires calibrating a model to samples that have information about both  
833 functional limitations, cognition, and adjudicated dementia diagnoses. However, making comparisons  
834 across surveys can be difficult, as each survey asks a different set of questions about cognition and  
835 limitations, although there is some overlap. This overlap allows for the use of item response theory  
836 methods for the harmonisation of these scales. Once the scales are harmonised, the subsamples can be  
837 used to create a model for the prediction of prevalence.

838 In GBD 2019, data from the ADAMS and HRS surveys were extracted and used for item response theory  
839 modelling to estimate prevalence. HRS is a nationally representative survey in the US that has data on  
840 cognition and functional limitations. ADAMS is a subsample of HRS that includes much more detailed  
841 neuropsychological testing and adjudicated dementia diagnoses. ADAMS includes almost all questions in  
842 HRS plus additional questions.

### 843 *Excluding incidence*

844 Since 2016, we have made the decision to exclude incidence data, because in locations with high-quality  
845 cohort data on prevalence and incidence, the two are not compatible (incidence data imply a higher  
846 prevalence than what is reported). Because dementia has a slow, insidious onset and prevalence is easier  
847 to measure, we trust prevalence data more and rely on this, excluding incidence data from DisMod.

## 848 Modelling strategy

849 First, prevalence data were sex-split, crosswalked, and age-split. Studies with age and sex detail  
850 separately were split into age-specific and sex-specific datapoints. Data specified as "both"-sex data were  
851 split into male- and female-specific datapoints using MR-BRT to get a model ratio of female/male  
852 prevalence and then using the following equations:

853 Male prevalence:

$$854 \quad prev_{male} = prev_{both} * \frac{pop_{both}}{(pop_{male} + ratio * pop_{female})}$$

Female prevalence:

$$prev_{female} = ratio * prev_{male}$$

We also split datapoints where the age range was greater than 25 years using the global age pattern.

Dementia studies are heterogeneous. Even with a smaller number of definitions (DSM/ICD), there are a large number of different ways to diagnose dementia. For example, out of 272 sources used in GBD 2017, there were 263 different methods of diagnosing dementia (overlap was among those who used 10/66 protocol or AGECAT algorithm). Most use a two-step procedure, where you screen using a cognitive test and then only fully evaluate those who fall below a certain pre-defined threshold. We controlled for methods differences by crosswalking alternative case definitions to reference. Study covariates are based on broad categories determined after going through the diagnostic heterogeneity, and there are some added for specific criteria that we know are biased. The same study-level covariates were used in 2019 as in 2017, with the addition of item response theory HRS predictions. Crosswalking was carried out using a logit difference network meta-regression analysis. US MarketScan data were separately crosswalked to standardise the claims data relative to existing literature data.

**MR-BRT crosswalk adjustment factors for dementia (network analysis)**

| Data input                            | Reference or alternative case definition | Gamma | Beta coefficient, logit (95% CI) | Adjustment factor* |
|---------------------------------------|------------------------------------------|-------|----------------------------------|--------------------|
| DSM or ICD case definition            | Ref                                      | 0.34  | ---                              | ---                |
| Clinical records diagnosis criteria   | Alt                                      |       | −0.05 (−0.72 to 0.61)            | 0.51               |
| Algorithm diagnosis criteria (AGECAT) | Alt                                      |       | 0.08 (−0.59 to 0.74)             | 0.50               |
| US MarketScan                         | Alt                                      |       | −0.95 (−1.61 to −0.28)           | 0.50               |
| NIA-AA diagnosis criteria             | Alt                                      |       | 0.51 (−0.16 to 1.17)             | 0.53               |
| 10/66 algorithm diagnosis criteria    | Alt                                      |       | 0.97 (0.30 to 1.64)              | 0.50               |
| GP records used for diagnosis         | Alt                                      |       | −1.21 (−1.88 to −0.54)           |                    |

A separate analysis was conducted to crosswalk MarketScan claims data (excluding MarketScan year 2000) to non-claims data using a spline on age. The plot below shows the model fit over different ages (gamma = 0.07).

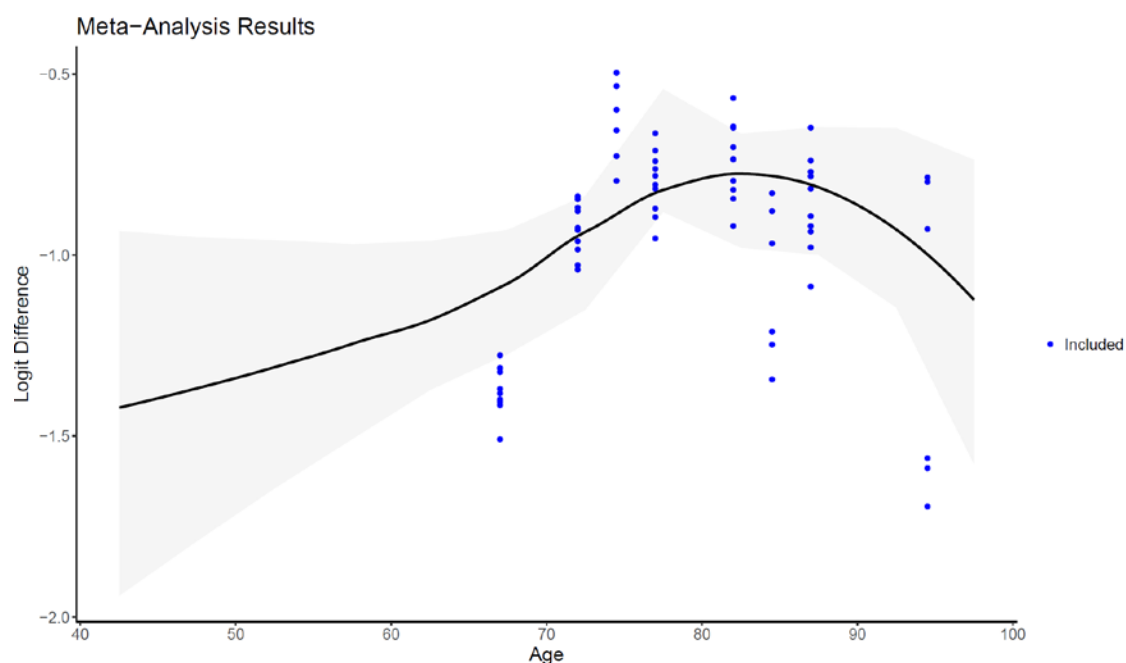

Two country-level covariates were included in the initial DisMod model. Age-standardised education was used as a proxy for general brain health/use that may be protective of dementia – specifically Alzheimer’s disease. Smoking prevalence (age-standardised, both sexes) was also used as a covariate to guide estimates, as the literature has shown a positive relationship between smoking and dementia.

Note that two DisMod models were run with prevalence inputs – the first uses adjusted prevalence data (DisMod Model 1 in flowchart), which accounts for dementia caused by other diseases. The second uses unadjusted dementia (DisMod Model 2 in flowchart), which accounts for all dementia regardless of cause (this is the dementia impairment envelope). The tables below summarise country-level covariates used in each of these DisMod models.

**Covariates.** Summary of covariates used in the Parkinson’s disease DisMod-MR meta-regression model (adjusted prevalence, Model 1).

| Covariate                                 | Type       | Exponentiated beta (95% uncertainty interval) |
|-------------------------------------------|------------|-----------------------------------------------|
| Smoking prevalence (age-standardised)     | Prevalence | 2.71 (1.03–7.36)                              |
| Educational attainment (age-standardised) | Prevalence | 0.92 (0.92–0.92)                              |

**Covariates.** Summary of covariates used in the Parkinson’s disease DisMod-MR meta-regression model (unadjusted prevalence, Model 2)

| Covariate | Type | Exponentiated beta (95% uncertainty interval) |
|-----------|------|-----------------------------------------------|
|           |      |                                               |

|                                              |            |                  |
|----------------------------------------------|------------|------------------|
| Smoking prevalence<br>(age-standardised)     | Prevalence | 1.00 (1.00–1.01) |
| Educational attainment<br>(age-standardised) | Prevalence | 0.92 (0.92–0.92) |

As mentioned previously, the estimation of morbidity due to dementia occurs in conjunction with the mortality estimation. Additional details on this process can be found in the appendix to the GBD Causes of Death summary paper.
